# Supplementary material for: Effect of surface overlayer in enhancing the photoelectrochemical water oxidation of in situ grown one-dimensional spinel zinc ferrite nanorods directly onto the substrate
Source: Royal Society of Chemistry journal article supplement (doi:10.1039/c8cc04882g), 2018-01-01
Supplement: c8cc04882g1.pdf [file c8cc04882g1.pdf]

## Electronic Supplementary Information

### Effect of surface overlayer in enhancing the photoelectrochemical water oxidation of *in-situ* grown one dimensional spinel zinc ferrite nanorods directly onto the substrate

#### EXPERIMENTAL SECTION

**Materials.** All of the chemicals used for experiments were of analytical grade. Milli-Q water (18.2 M $\Omega$ ) was used for solution preparation and synthesis. Anhydrous ferric chloride, sodium nitrate, aluminium nitrate nonahydrate, and hydrochloric acid were purchased from Merck. Zinc nitrate hexahydrate, and sodium hydroxide were purchased from Sigma-Aldrich. Fluorine doped tin oxide (FTO) coated glass slide (surface resistivity  $\sim 7 \Omega/\text{sq}$ ) were purchase from Sigma-Aldrich.

#### *In situ* growth of $\text{ZnFe}_2\text{O}_4$ by $\beta$ - $\text{FeOOH}$ route:

The  $\text{ZnFe}_2\text{O}_4$  photoanode was fabricated on the FTO substrate by modification of a previously reported two-step solution method.<sup>S1, S2</sup> First, to a 100 mL teflon-lined stainless steel autoclave containing 30 mL of an aqueous solution of 0.15 M ferric chloride ( $\text{FeCl}_3$ , 97%) and 1 M sodium nitrate ( $\text{NaNO}_3$ , 99%) and 158  $\mu\text{L}$  hydrochloric acid ( $\text{HCl}$ , wt 36%), four pieces of cleaned FTO substrate were put with the conducting layer facing upward. The autoclave was heated at 95  $^\circ\text{C}$  for 4 hours. This results in the formation of a uniform layer of yellow  $\beta$ - $\text{FeOOH}$  nanorods over the FTO substrate. The  $\text{FeOOH}$ -coated substrate was then washed with deionized water and ethanol to remove any residual salt. The as prepared  $\beta$ - $\text{FeOOH}$  film were dipped in to a solution containing 1M  $\text{Zn}(\text{NO}_3)_2 \cdot 6\text{H}_2\text{O}$  for 30 minutes. The wet electrode was transferred to a furnace which was already heated to 550  $^\circ\text{C}$  and annealed for 2 hours. During the annealing process, the  $\beta$ - $\text{FeOOH}$  nanorods turned into  $\text{ZnFe}_2\text{O}_4$  nanorods wrapped with an excess  $\text{ZnO}$  layer. This unwanted  $\text{ZnO}$  skin was removed by soaking in a 1 M  $\text{NaOH}$  solution for 12 h with stirring. To reduce the surface defect sites, the  $\text{ZnFe}_2\text{O}_4$  nanorods were treated again at 550 $^\circ\text{C}$  for 1 hour or 800 $^\circ\text{C}$  for 10 minutes.

#### Synthesis of $\text{Al}_2\text{O}_3$ coated $\text{ZnFe}_2\text{O}_4$ nanorods

The as-prepared  $\text{ZnFe}_2\text{O}_4$ -800 films were coated with  $\text{Al}_2\text{O}_3$  overlayers by chemical bath deposition (CBD) method.<sup>S3</sup> In this method, the  $\text{ZnFe}_2\text{O}_4$  films were dipped in to a 200 mL solution containing 1 gm  $\text{Al}(\text{NO}_3)_3 \cdot 9\text{H}_2\text{O}$  and 0.8 gm urea for 90°C for 60 minutes. After that the films were dried and annealed at 550°C for 2 hours in a muffle furnace. The as prepared film was named as  $\text{ZnFe}_2\text{O}_4\text{-Al}_2\text{O}_3$ .

It is found that reaction time is very crucial for 1-D growth of  $\beta\text{-FeOOH}$  nanostructures. With the increase in the reaction time, urchin like structures grows over the nanorods as shown in Figure S1 (b & c). Hence, the reaction time was optimized to 4 hours for uniform and 1-D growth of  $\beta\text{-FeOOH}$  nanorods (Figure S1a). All the annealing temperatures were chosen such that it does not affect the conductivity of the FTO substrate. The post annealing treatment of  $\text{ZnFe}_2\text{O}_4$ , after etching ZnO layer, was done to reduce the surface defects such as dangling bonds or lattice disorder which could have facilitated nonradiative recombination.<sup>S2</sup> The cross-sectional FESEM image of  $\beta\text{-FeOOH}$  confirms the formation of nanorods, whereas the cross-sectional FESEM images  $\text{ZnFe}_2\text{O}_4$ -800 and  $\text{ZnFe}_2\text{O}_4\text{-Al}_2\text{O}_3$  shows some deformation of these nanorods due to high temperature annealing (Figure S1 (d-f)).

**Material Characterization.** The powder X-ray diffraction measurements were performed using Rigaku TTRAX III X-ray diffractometer where Copper  $\text{K}\alpha$  ( $\lambda = 1.54 \text{ \AA}$ ) was used as the source with 18kW power. The XRD patterns for the  $2\theta$  range of  $20^\circ\text{--}70^\circ$  was recorded at the scan rate  $0.3^\circ/\text{s}$ . For the measurement of UV-visible absorption spectra, a JASCO (Model V-650) spectrophotometer was used. The Fourier transform infrared (FT-IR) spectra was recorded using PerkinElmer Spectrum Two instrument in KBr pellets by scratching the as prepared films. Raman spectra analysis was done using Laser Micro Raman System (Horiba Jobin Vyon, Model LabRam HR) with 488 nm laser excitation. To know the surface morphology, the FESEM of all of the samples was investigated on a Zeiss (model- Gemini and Sigma) instrument operated at 5 kV. FETEM measurements of the samples were carried out in a JEOL (JEM-2100F) microscope with an operating voltage of 200 kV. X-ray photoelectron spectroscopy (XPS) were carried out using an ESCALAB Xi+ (Made: Thermo Fisher Scientific Pvt. Ltd., UK) photoelectron spectrometer with a monochromatized  $\text{Al-K}\alpha$  ( $h\nu = 1486.6 \text{ eV}$ ) X-ray source of. In this analysis, all the peaks were referenced with respect to C 1s spectrum (284.77 eV) to compensate the surface charging effect and by the help of XPSPEAK 4.1 software, all XPS core level spectral data were analyzed.

Incident photon-to-current conversion efficiency (IPCE) of the photoanodes were measured in a Newport Oriel IQE-200 instrument with a 250 W quartz tungsten halogen (QTH) lamp as the light source.

**Photoelectrochemical measurements.** The photoelectrochemical measurements of the samples were performed with an electrochemical analyzer (model-CHI1120B) in a three-electrode system. 1M NaOH solution was used as electrolyte during measurements. As fabricated samples were used as working electrodes, Ag/AgCl(aqueous) electrode was used as reference and a Pt wire was used as counter electrode. All the potential applied were converted into reversible hydrogen electrode (RHE) potential by following formula:

$$E_{\text{RHE}} = E_{\text{Ag/AgCl}} + 0.059\text{pH} + E^{\circ}_{\text{Ag/AgCl}} \quad (01)$$

where  $E_{\text{RHE}}$  is the converted potential vs. RHE,  $E_{\text{Ag/AgCl}}$  is the experimentally measured potential vs. Ag/AgCl,  $E^{\circ}_{\text{Ag/AgCl}}$  is the standard potential of Ag/AgCl reference electrode against the RHE (0.1976 V) and pH is the pH of the electrolyte. The light source was provided by a 300 W halogen lamp, and the light intensity was adjusted to 100 mW/cm<sup>2</sup>. The electrochemical impedance spectra (EIS) were measured using an electrochemical work station (Model CHI680E, Inc., Austin, TX) in 1 M NaOH aqueous solution in a frequency range of 10,000 Hz to 0.1 Hz with an amplitude of 10 mV under light illumination. Mott–Schottky curves were obtained in a DC potential range from -0.4 to 0.6 V vs. Ag/AgCl with a frequency of 1000 Hz under dark conditions. The flat band ( $E_{\text{FB}}$ ) and carrier density ( $N_{\text{D}}$ ) of bare ZnFe<sub>2</sub>O<sub>4</sub> and Al<sub>2</sub>O<sub>3</sub> coated ZnFe<sub>2</sub>O<sub>4</sub> were calculated from the following formula:

$$\frac{1}{C^2} = \frac{1}{N_{\text{D}}e\epsilon\epsilon_0} \left[ E - E_{\text{FB}} - \frac{kT}{e} \right] \quad (02)$$

where  $C$  is the capacitance of the semiconductor,  $N_{\text{D}}$  is the electron carrier density of semiconductor,  $e$  is the fundamental charge constant,  $\epsilon_0$  is the permittivity of the vacuum,  $\epsilon$  is the relative permittivity of the semiconductor,  $E$  is the applied potential,  $k$  is the Boltzmann constant, and  $T$  is the temperature.

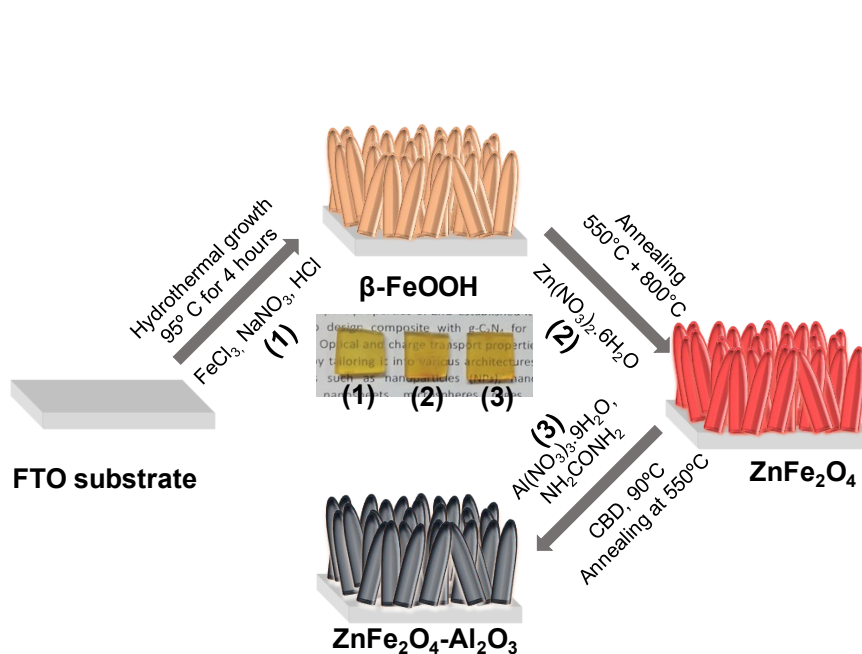

Scheme 1. Step-by-step fabrication of  $\text{ZnFe}_2\text{O}_4\text{-Al}_2\text{O}_3$  photoanode (1) Fabrication of  $\beta\text{-FeOOH}$  nanorods over FTO substrate, (2) conversion of  $\beta\text{-FeOOH}$  to  $\text{ZnFe}_2\text{O}_4$  by wet dipping of Zn precursor followed by annealing<sup>S2</sup> and (3) deposition of  $\text{Al}_2\text{O}_3$  over  $\text{ZnFe}_2\text{O}_4$  by chemical bath deposition (CBD) method.

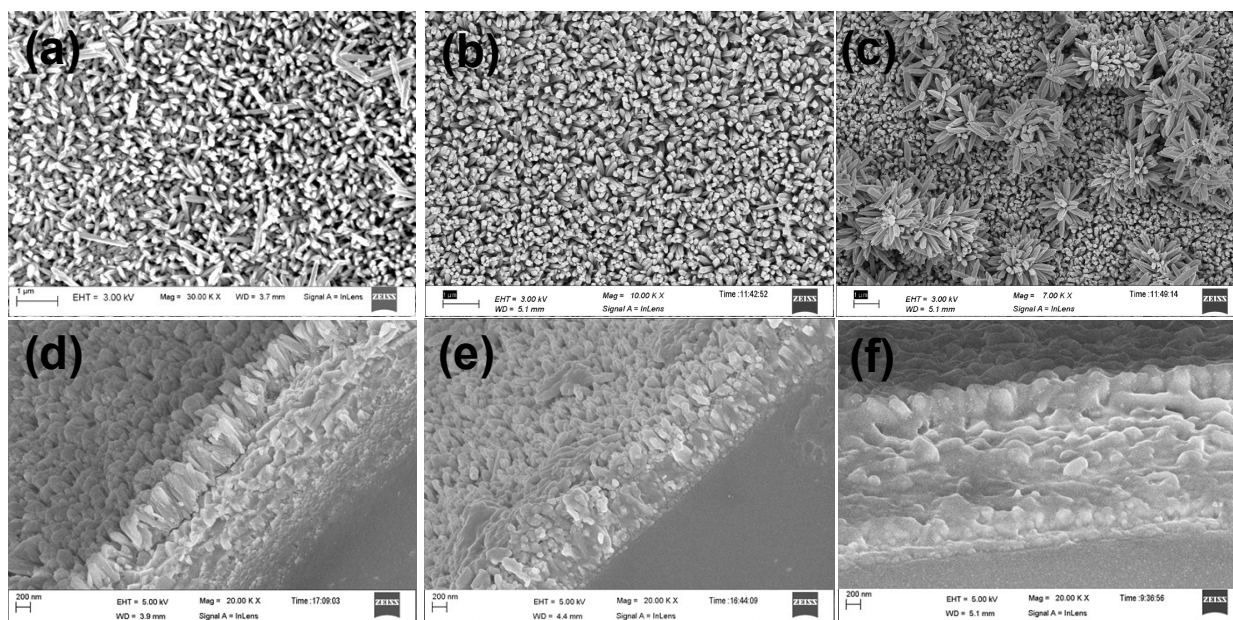

**Figure S1.** FESEM images showing  $\beta$ -FeOOH nanorods(a),  $\text{ZnFe}_2\text{O}_4$  prepared with different growth time of  $\beta$ -FeOOH nanorods- 4 hours (b) and 6 hours (c), cross-sectional view of  $\beta$ -FeOOH (d),  $\text{ZnFe}_2\text{O}_4$ -800 (e) and  $\text{ZnFe}_2\text{O}_4\text{-Al}_2\text{O}_3$  (f).

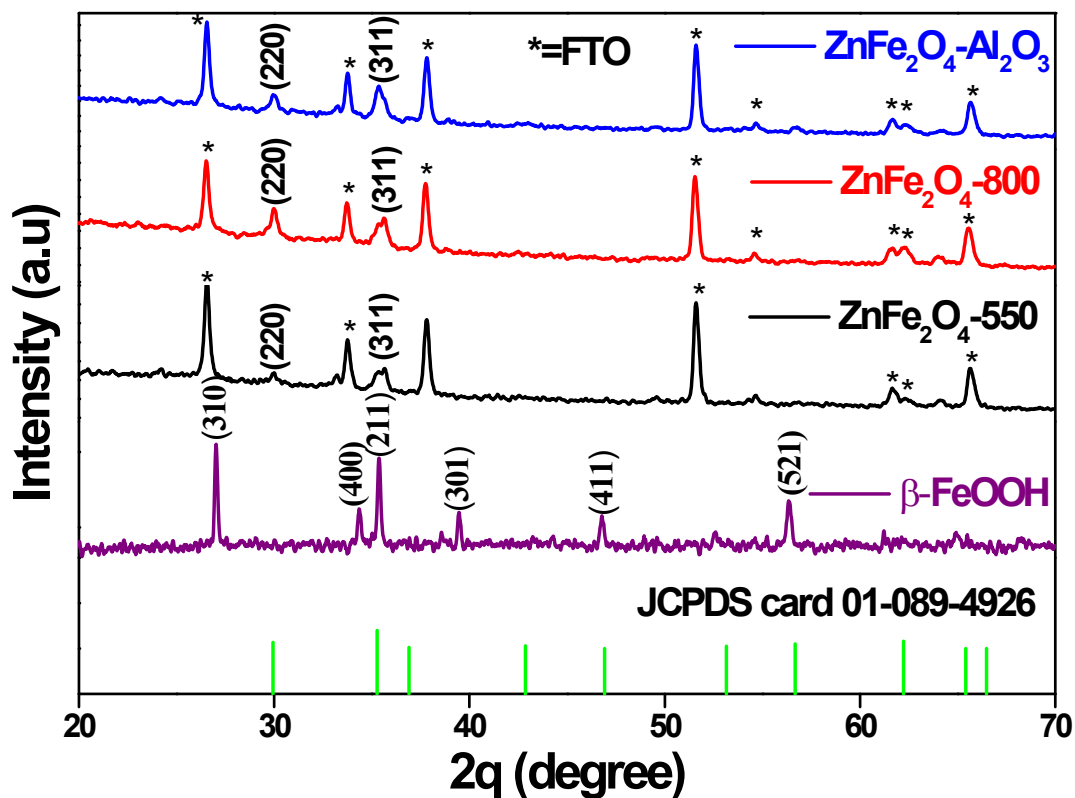

**Figure S2.** Powder XRD of  $\beta$ -FeOOH,  $\text{ZnFe}_2\text{O}_4$ -550,  $\text{ZnFe}_2\text{O}_4$ -800 and  $\text{ZnFe}_2\text{O}_4\text{-Al}_2\text{O}_3$ .

The powder XRD of  $\beta$ -FeOOH was well matched with JCPDS card 75-1549. The peaks at  $2\theta = 30^\circ$  represent the (220) crystal planes and  $2\theta = 35.2^\circ$  represent the (311) crystal planes of the cubic spinel  $\text{ZnFe}_2\text{O}_4$  (The green vertical lines represent peaks of cubic spinel  $\text{ZnFe}_2\text{O}_4$ , JCPDS card 01-089-4926). There were no impurities of ZnO or  $\text{Fe}_2\text{O}_3$  present in the XRD pattern of  $\text{ZnFe}_2\text{O}_4$ . The weak XRD peaks of  $\text{ZnFe}_2\text{O}_4$  became sharp with further temperature treatment at  $800^\circ\text{C}$ . As the films were directly grown over FTO substrate, the peaks of  $\text{SnO}_2$  were clearly visible.

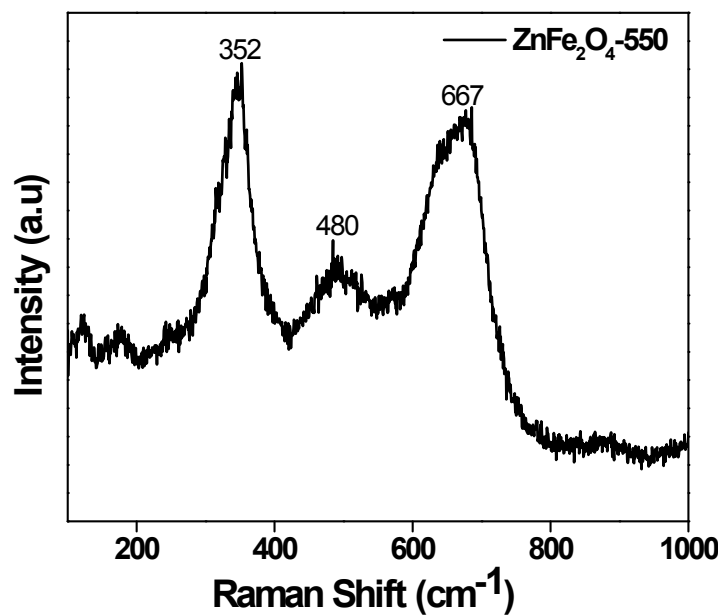

**Figure S3.** Raman spectra of ZnFe<sub>2</sub>O<sub>4</sub>-800.

ZnFe<sub>2</sub>O<sub>4</sub> has a spinel structure with space group *Fd3m*. Out of five Raman modes three were observed at 352 cm<sup>-1</sup>, 480 cm<sup>-1</sup> and 667 cm<sup>-1</sup>. The motion of oxygen in tetrahedral AO<sub>4</sub> groups happens at modes above 600 cm<sup>-1</sup>. These modes can be assigned to A<sub>1g</sub> symmetry and the other low frequency modes to both E<sub>g</sub> and F<sub>2g</sub> which were the characteristics of the octahedral sites (BO<sub>6</sub>).<sup>S4,S5</sup>

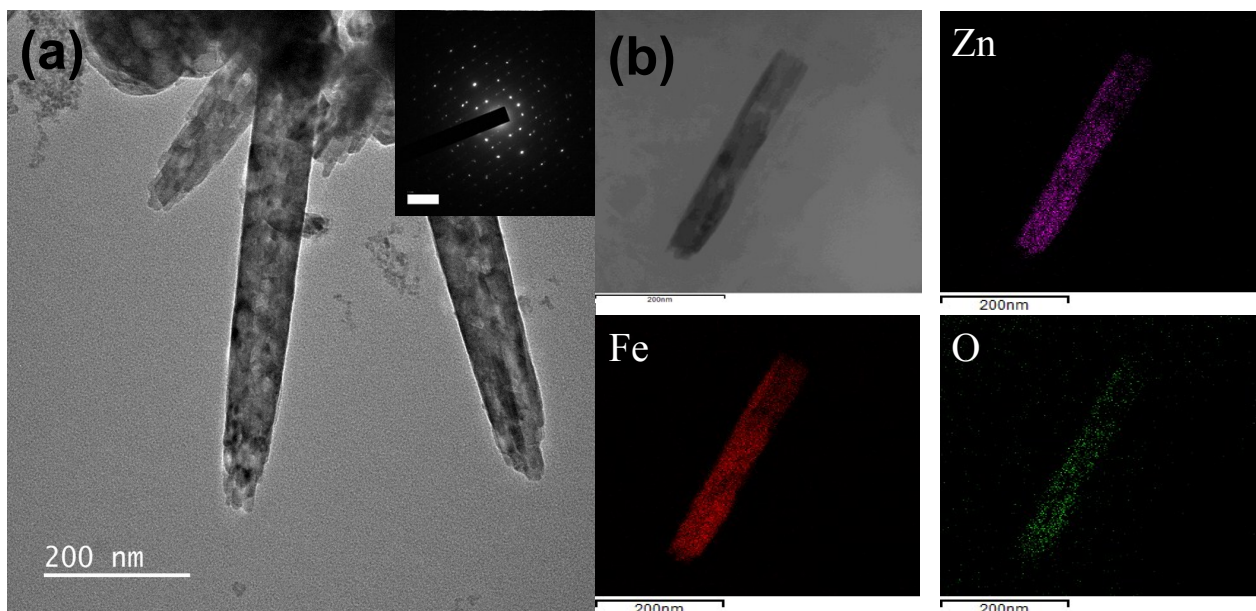

**Figure S4.** (a)TEM image of  $\text{ZnFe}_2\text{O}_4$ -800 and (b) elemental mapping of  $\text{ZnFe}_2\text{O}_4$ -800. Inset of (a) showing the SAED pattern of  $\text{ZnFe}_2\text{O}_4$ -800. The uniform distribution of all the elements and SAED pattern showing single crystalline phase confirmed the formation of  $\text{ZnFe}_2\text{O}_4$ -800.

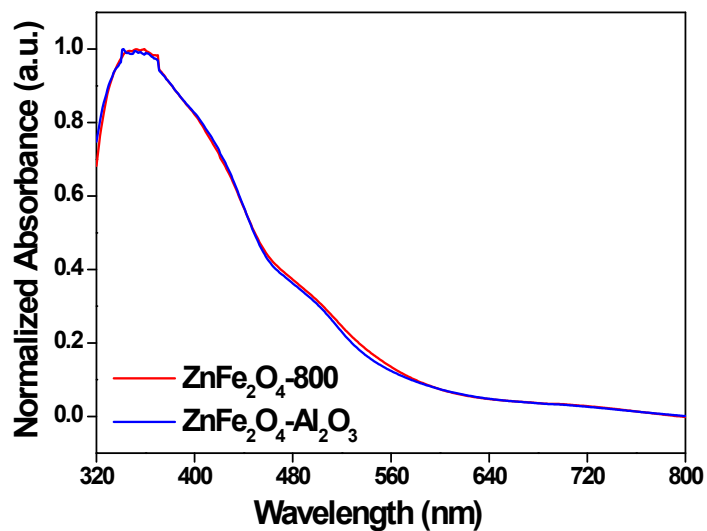

**Figure S5.** UV-visible spectrum of  $\text{ZnFe}_2\text{O}_4$ -800 and  $\text{ZnFe}_2\text{O}_4\text{-Al}_2\text{O}_3$

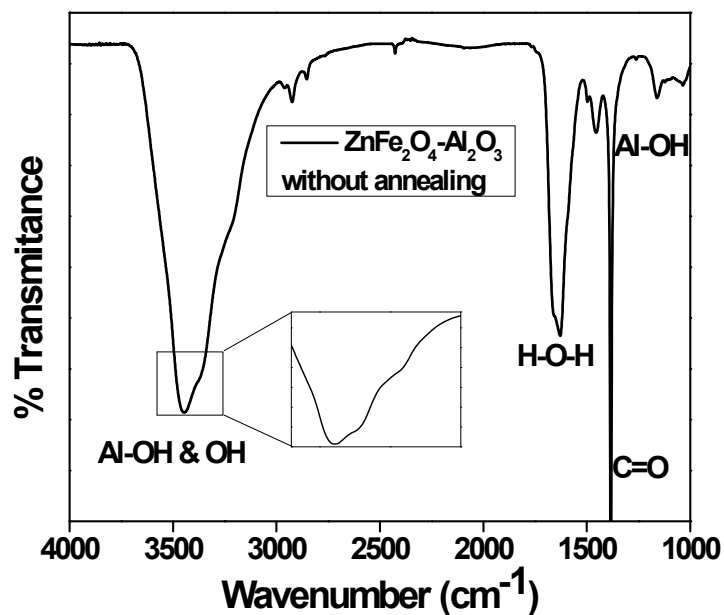

**Figure S6.** FT-IR spectrum of  $\text{ZnFe}_2\text{O}_4$  treated with CBD process without annealing.

The wavenumber of  $1040\text{ cm}^{-1}$  could be assigned to Al-OH bending. The peaks at  $3450$ ,  $3367\text{ cm}^{-1}$  might be attributed to Al-OH stretching. The  $1375\text{ cm}^{-1}$  corresponding to C=O was identified to the urea used in the CBD bath, which will be removed during the annealing treatment. The H-O-H bending exhibits the peak of  $1623\text{ cm}^{-1}$ , indicating the absorption of water.<sup>S3</sup>

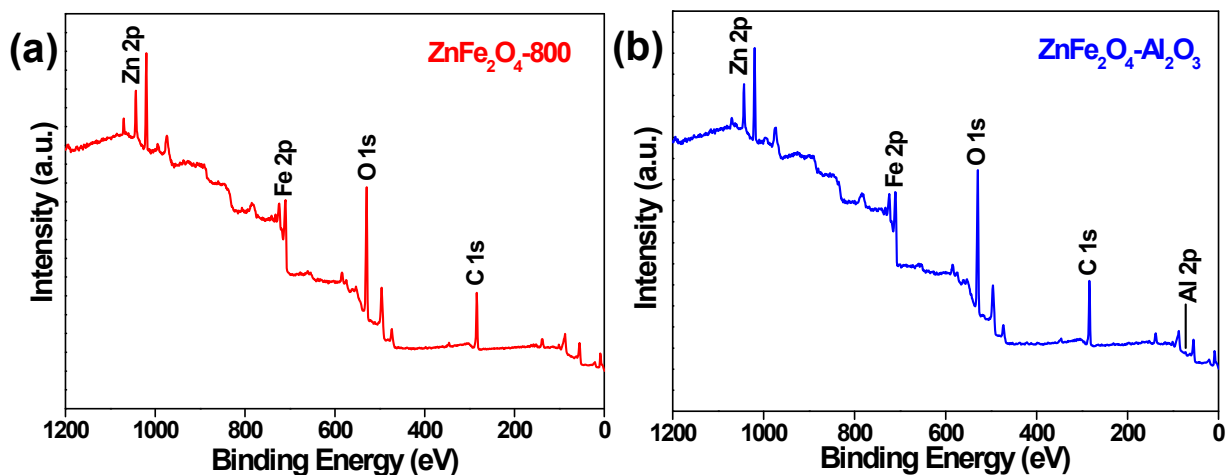

**Figure S7.** XPS survey spectra of (A)  $\text{ZnFe}_2\text{O}_4$  and (B)  $\text{ZnFe}_2\text{O}_4\text{-Al}_2\text{O}_3$ .

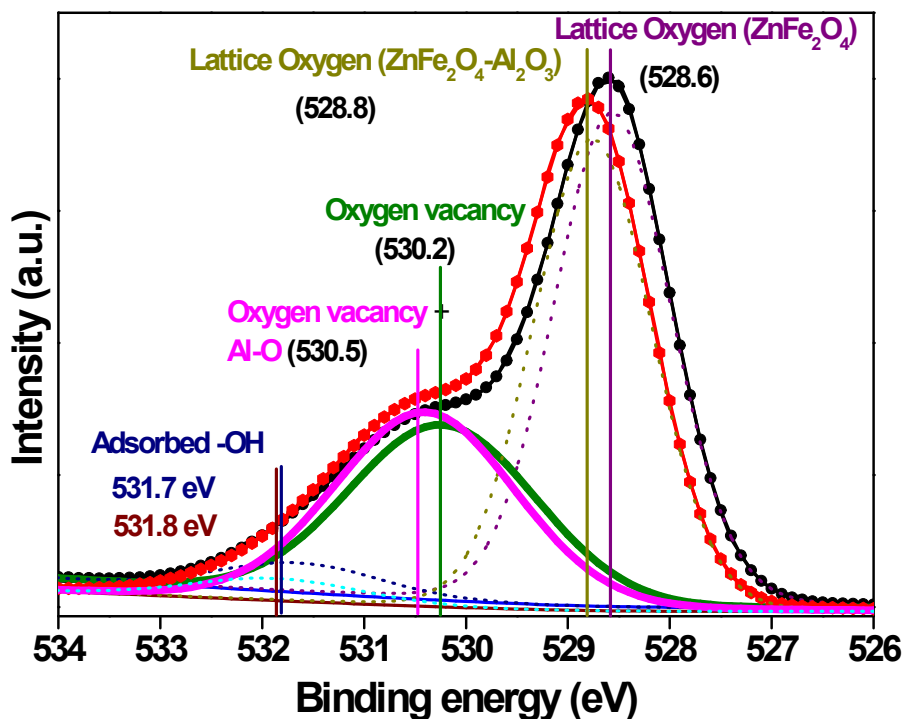



**Figure S8.** O 1s core level of  $\text{ZnFe}_2\text{O}_4$  (black line) and  $\text{ZnFe}_2\text{O}_4\text{-Al}_2\text{O}_3$  (red line) where the dotted line in the lower binding energy corresponds to lattice oxygen and the dotted line in the higher binding energy corresponds to adsorbed  $-\text{OH}$ . In the middle region the peak at 530.2 eV of bare  $\text{ZnFe}_2\text{O}_4$  (olive line) corresponds mainly due to oxygen vacancy and the peak at 530.5 eV of  $\text{ZnFe}_2\text{O}_4\text{-Al}_2\text{O}_3$  (magenta line) is due to contribution of oxygen vacancy as well as Al-O of alumina, which is confirmed by the shift in this peak towards higher binding energy and increase in peak area as compared to bare  $\text{ZnFe}_2\text{O}_4$ .

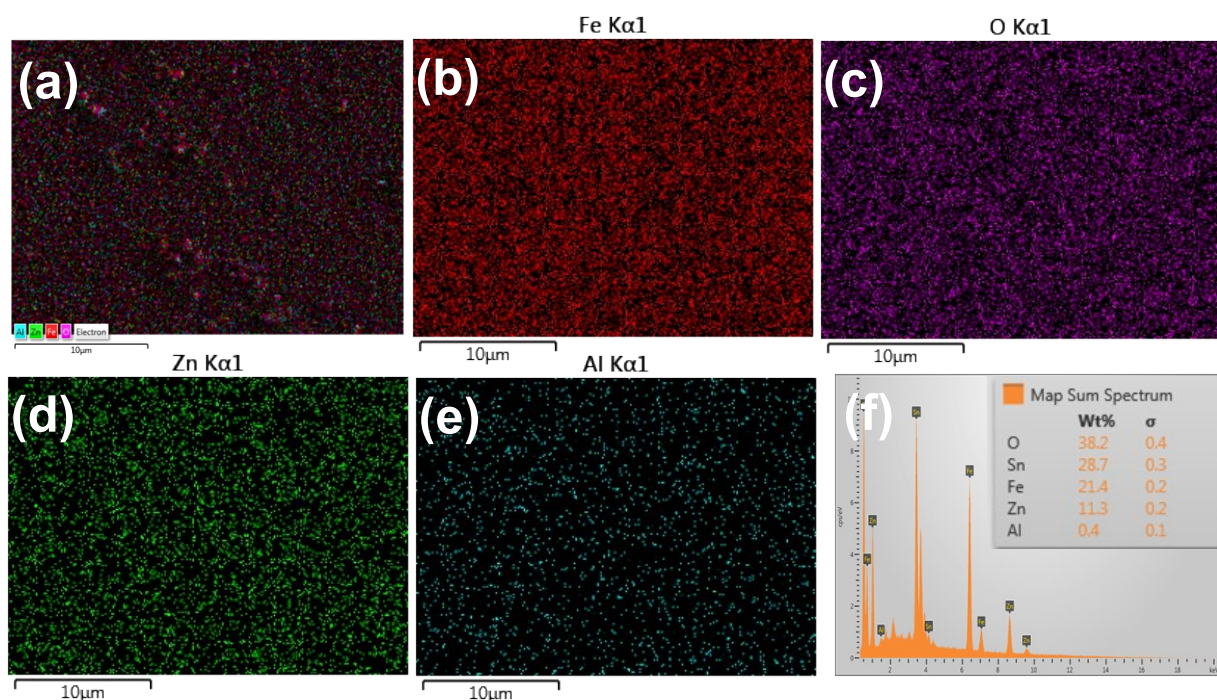

**Figure S9.** (a) Elemental mapping of  $\text{ZnFe}_2\text{O}_4\text{-Al}_2\text{O}_3$  showing the uniform distribution of (b) Fe, (c) O, (d) Zn, and (e) Al. (f) FESEM-EDX showing elemental composition.

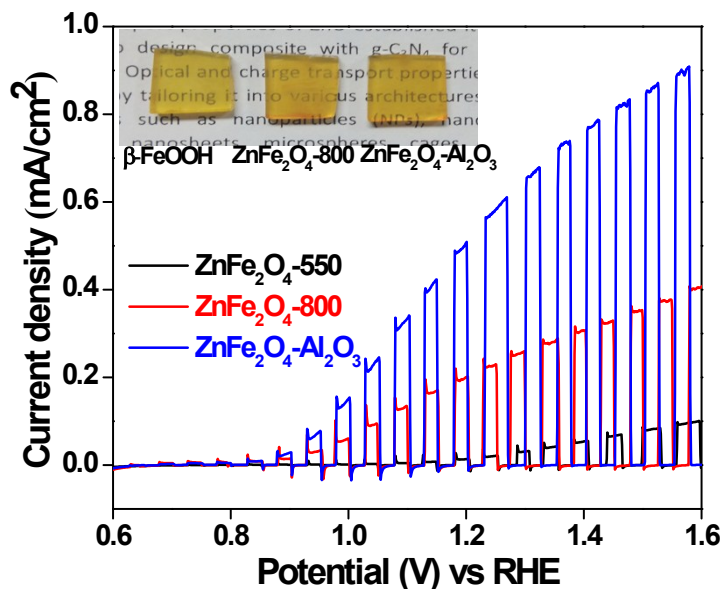

**Figure S10.** J-V curves of all the photoanodes with chopped light-dark. Inset to the figure showing digital photos of fabricated photoanodes.

The anodic current spikes and cathodic transient peaks of  $\text{ZnFe}_2\text{O}_4\text{-Al}_2\text{O}_3$  disappeared when the bias was more positive than 1.23 V vs. RHE, indicating that accumulation and recombination of holes were prevented by CBD- $\text{Al}_2\text{O}_3$ . In contrast, the cathodic transient peaks of  $\text{ZnFe}_2\text{O}_4\text{-550}$  and  $\text{ZnFe}_2\text{O}_4\text{-800}$  were visible after 1.23 V vs. RHE. This experimental evidence confirmed that the PEC performance improved with introduction of CBD- $\text{Al}_2\text{O}_3$ .

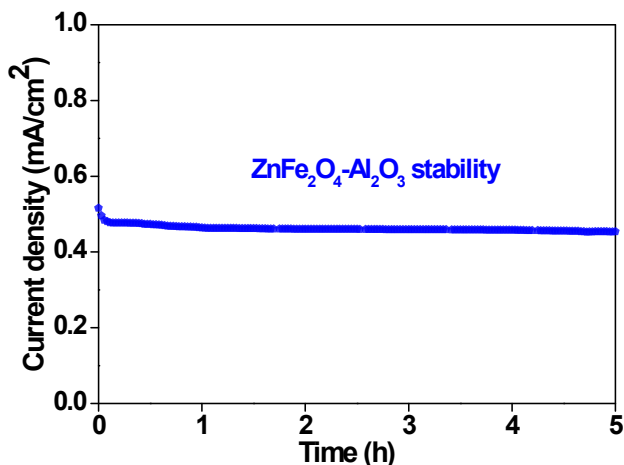

**Figure S11.** Stability of  $\text{ZnFe}_2\text{O}_4\text{-Al}_2\text{O}_3$  photoanode under light illumination at 1.23 V vs. RHE.

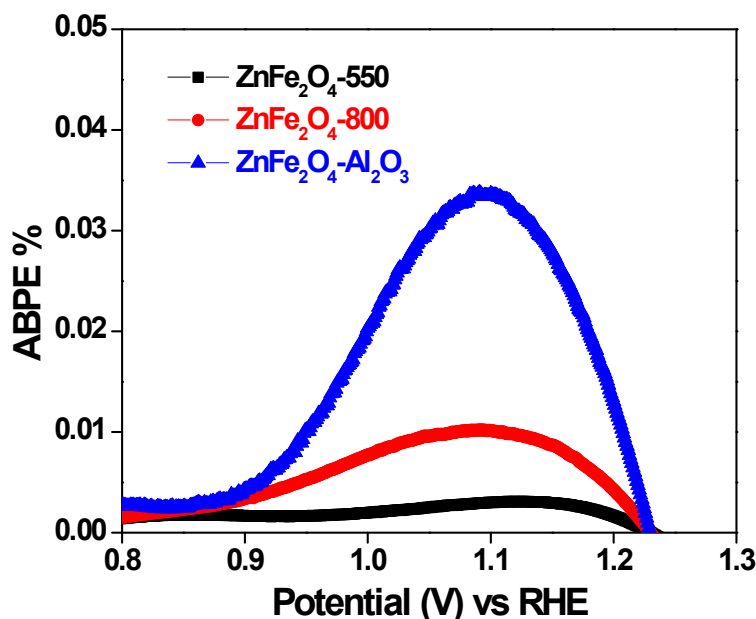

**Figure S12.** The applied bias photon-to-current efficiencies (ABPE) of all the photoanodes to quantitatively evaluate the PEC water oxidation efficiency. A maximum of 0.034% photoconversion efficiency was achieved for the ZnFe<sub>2</sub>O<sub>4</sub>-Al<sub>2</sub>O<sub>3</sub> photoanode at 1.1 V vs. RHE, which was 11 and 3 times higher than that of ZnFe<sub>2</sub>O<sub>4</sub>-550 and ZnFe<sub>2</sub>O<sub>4</sub>-800, respectively.

The applied bias photon-to-current efficiency (ABPE) was calculated using the following equation:

$$ABPE = \left[ \frac{J_{photo}(1.23 - V)}{P} \right] \quad (S3)$$

Where V is the voltage that is applied vs. RHE to the cell from an external power source and  $J_{photo}$  is the photocurrent measured at this voltage and P is the power density of incident light.<sup>S6</sup>

**Table S1.** Comparison with similar literature reports

| Photoanodes | Fabrication method | Photocurrent (1.23 V vs RHE) | References |
|-------------|--------------------|------------------------------|------------|
|             |                    |                              |            |

|                                                                  |                                             |                                                  |            |
|------------------------------------------------------------------|---------------------------------------------|--------------------------------------------------|------------|
| Hydrogen treated ZnFe <sub>2</sub> O <sub>4</sub>                | Solvothermal method                         | 320 $\mu$ A                                      | S1         |
| HMA treatment of ZnFe <sub>2</sub> O <sub>4</sub>                | Solvothermal method                         | 240 $\mu$ A                                      | S2         |
| Hydrogen treated ZnFe <sub>2</sub> O <sub>4</sub>                | Solvothermal method                         | 200 $\mu$ A                                      | S4         |
| ZnFe <sub>2</sub> O <sub>4</sub>                                 | Aerosol-assisted chemical vapour deposition | 350 $\mu$ A (1.15 V vs. RHE)                     | S5         |
| macroporous ATO coated ZnFe <sub>2</sub> O <sub>4</sub>          | Atomic layer deposition                     | 260 $\mu$ A                                      | S7         |
| Ti-doped ZnFe <sub>2</sub> O <sub>4</sub>                        | Spray pyrolysis method                      | 350 $\mu$ A                                      | S8         |
| SrTiO <sub>3</sub> :ZnFe <sub>2</sub> O <sub>4</sub>             | Pulsed laser deposition                     | 188 $\mu$ A                                      | S9         |
| ZnFe <sub>2</sub> O <sub>4</sub>                                 | Chemical vapour deposition                  | 85 $\mu$ A (1.6 vs RHE)                          | S10        |
| ZnFe <sub>2</sub> O <sub>4</sub> -Al <sub>2</sub> O <sub>3</sub> | Solvothermal method                         | <b>484 <math>\mu</math>A</b><br><b>(0.48 mA)</b> | This study |

## References

- S1.** J. H. Kim, Y. J. Jang, J. H. Kim, J.-W. Jang, S. H. Choi, J. S. Lee, *Nanoscale*, 2015, **7**, 19144.
- S2.** J. H. Kim, J. H. Kim, J.-W. Jang, J. Y. Kim, S. H. Choi, G. Magesh, J. Lee, J. S. Lee, *Adv. Energy Mater.*, 2015, **5**, 1401933.
- S3.** Z. Fan, Z. Xu, S. Yan, Z. Zou, *J. Mater. Chem. A*, 2017, **5**, 8402.
- S4.** N. Guijarro, P. Bornoz, M. Pr'évot, X. Yu, X. Zhu, M. Johnson, X. Jeanbourquin, F. Le Formal and K. Sivula, *Sustainable Energy Fuels*, 2018, **2**, 103.

- S5.** A. A. Tahir, K. G. U. Wijayantha, *J. Photochem. Photobiol., A*, 2010, **216**, 119.
- S6.** H. Dotan, N. Mathews, T. Hisatomi, M. Graätzel, A. Rothschild, *J. Phys. Chem. Lett.*, 2014, **5**, 3330.
- S7.** A. G. Hufnagel, K. Peters, A. Müller, C. Scheu, D. Fattakhova-Rohlfing, T. Bein, *Adv. Funct. Mater.*, 2016, **26**, 4435.
- S8.** Y. Guo, N. Zhang, X. Wang, Q. Qian, S. Zhang, Z. Li, Z. Zou, *J. Mater. Chem. A*, 2017, **5**, 7571.
- S9.** S. Cho, J.-W. Jang, L. G. Li, J. Jian, H. Y. Wang, J. L. MacManus-Driscoll, *Chem. Mater.*, 2016, **28**, 3017.
- S10.** D. Peeters, D. H. Taffa, M. M. Kerrigan, A. Ney, N. Jöns, D. Rogalla, S. Cwik, H.-W. Becker, M. Grafen, A. Ostendorf, C. H. Winter, S. Chakraborty, M. Wark, A. Devi, *ACS Sustainable Chem. Eng.*, 2017, **5**, 2917.
